# Supplementary material
Source: MDPI journal article supplement (https://www.mdpi.com/2077-0472/11/2/166)
Supplement: s1 [file s1]

| AGI codes | Gene Name                           |
|-----------|-------------------------------------|
| AT1G02890 | No name was assigned for this gene  |
| AT1G60700 | No name was assigned for this gene  |
| AT1G75530 | No name was assigned for this gene  |
| AT2G21530 | No name was assigned for this gene  |
| AT2G24410 | No name was assigned for this gene  |
| AT2G45460 | No name was assigned for this gene  |
| AT3G02400 | FORKHEADASSOCIATED DOMAIN 3 (FHA3)  |
| AT3G02680 | NIJMEGEN BREAKAGE SYNDROME 1 (NBS1) |
| AT3G07220 | FORKHEADASSOCIATED DOMAIN 2 (FHA2)  |
| AT3G07260 | No name was assigned for this gene  |
| AT3G13780 | No name was assigned for this gene  |
| AT3G20550 | DAWDLE (DDL)                        |
| AT3G54350 | EMBRYO DEFECTIVE 1967 (EMB 1967)    |
| AT4G02480 | No name was assigned for this gene  |
| AT4G14490 | No name was assigned for this gene  |
| AT5G07400 | No name was assigned for this gene  |
| AT5G38840 | No name was assigned for this gene  |
| AT5G47790 | No name was assigned for this gene  |
